# Supplementary material
Source: PubMed Central journal article supplement (PMC3874217)

## Supplementary Information

### Supplementary Table 1

| Gene name            | Forward Primer          | Reverse Primer            | Comments |
|----------------------|-------------------------|---------------------------|----------|
| beta-actin           | GGCTGTATTCCCCTCCATCG    | CCAGTTGGTAACGCCATG        |          |
| IFN- $\gamma$        | ACTGGCAAAGGATGGTG       | GTTGCTGATGGCCTGATT        |          |
| IL-4                 | AGATCATCGGCATTTTGAACG   | TTTGGCACATCCATCTCCG       |          |
| IL-17A               | CTCCAGAAGGCCCTCAGACTA   | AGCTTCCCTCCGCATTGACA      |          |
| IL-17F               | CCCATGGGATTACAACATCAC   | CACTGGGCCTCAGCGATC        |          |
| IL-22                | GTGGGATCCCTGATGGCTGTC   | AGCGAATTCTCGCTCAGACTG     |          |
| IL-23R               | ACACTGGGAAGCCTACCTACA   | AGCTTGGACCCATACCAAATA     |          |
| T-bet                | CAACAACCCCTTTGCCAAAG    | TCCCCAAGCAGTTGACAGT       |          |
| ROR $\gamma$         | CACGGCCCTGGTTCTCAT      | CAGATGTTCCACTCTCCTCTTCTCT |          |
| ROR $\alpha$         | TCTCCCTGCGCTCTCCGCAC    | TCCACAGATCTTGCATGGA       |          |
| Foxp3                | GGCCCTTCTCCAGGACAGA     | GCTGATCATGGCTGGGTTGT      |          |
| CCR6                 | CCTCACATTCTTAGGACTGGAGC | GGCAATCAGAGCTCTCGGA       |          |
| LFA-1                | CCAGACTTTTGCTACTGGGAC   | GCTTGTTCCGGCAGTGATAGAG    |          |
| c-MAF                | AGCAGTTGGTGACCATGTCTG   | TGGAGATCTCCTGCTTGAGG      |          |
| Runx1                | TACCTGGGATCCATCACCTC    | GACGGCAGAGTAGGGAAGT       |          |
| AHR                  | AGCAGCTGTGTCAGATGGTG    | CTGAGCAGTCCCCTGTAAGC      |          |
| IRF-4                | GCAGCTCACTTTGGATGACA    | CCAAACGTCACAGGACATTG      |          |
| SOCS3                | AGCTCCAAAAGCGAGTACCA    | TGACGCTCAACGTGAAGAAG      |          |
| I $\kappa$ B $\zeta$ | TCCAGAATGTCCCAGTCTCC    | GAGTCTCAGTTTGGGGTGA       |          |

|                                          |                                                        |                                                        |                                                          |
|------------------------------------------|--------------------------------------------------------|--------------------------------------------------------|----------------------------------------------------------|
| BATF                                     | CCAGAAGAGCCGACAGAGAC                                   | GAGCTGCGTTCTGTTTCTCC                                   |                                                          |
| HIF1                                     | AGCTTCTGTTATGAGGCTCACC                                 | TGACTTGATGTTTCATCGTCCTC                                |                                                          |
| GATA-3                                   | CTCGGCCATTTCGTACATGGAA                                 | GGATACCTCTGCACCGTAGC                                   |                                                          |
| hOrai1Δloop2<br>Fragment 1               | GCG CTC GAG ATG CAT CCG GAG CCC<br>GCC CCG             | CGC CGC GGC CGC GAG GGG CAA GAA<br>CTT GAC             |                                                          |
| hOrai1ΔEloop2<br>Fragment 2              | CGC GCG GCC GCG CCG GGC CAG<br>GCA GCT GCC             | CGC GAA TTC GGC ATA GTG GCT GCC<br>GGG CGT             | Digest fragment 1<br>and 2 and ligate with<br>the vector |
| hOrai1Q108-<br>110AAANotI-<br>fragment 1 | GCG CTC GAG ATG CAT CCG GAG CCC<br>GCC CCG             | CGC CGC GGC CGC CAC CTC CAC CAT<br>TGC CAC CAT         |                                                          |
| hOrai1Q108-<br>110AAANotI-<br>fragment 2 | CGC GCG GCC GCG GCT GAC CAC GAC<br>TAC CCA             | CGC GAA TTC GGC ATA GTG GCT GCC<br>GGG CGT             | Digest fragment 1<br>and 2 and ligate with<br>the vector |
| hOrai1D110/112A                          | GTG GAG GTG CAG CTG GCC GCT GCC<br>CAC GAC TAC CCA CCG | CGG TGG GTA GTC GTG GGC AGC GGC<br>CAG CTG CAC CTC CAC |                                                          |
| hOrai1E106D                              | ATG GTG GCA ATG GTG GAC GTG CAG<br>CTG GAC GCT         | AGC GTC CAG CTG CAC GTC CAC CAT<br>TGC CAC CAT         |                                                          |
| hOrai1L95A                               | AGC CGG ACC TCG GCT GCG CTC TCC<br>GGC TTC GCC         | GGC GAA GCC GGA GAG CGC AGC CGA<br>GGT CCG GCT         |                                                          |
| hOrai1V102C                              | TCC GGC TTC GCC ATG TGT GCA ATG<br>GTG GAG GTG         | CAC CTC CAC CAT TGC ACA CAT GGC<br>GAA GCC GGA         |                                                          |
| hOrai1V102A                              | TCC GGC TTC GCC ATG GCG GCA ATG<br>GTG GAG GTG         | CAC CTC CAC CAT TGC CGC CAT GGC<br>GAA GCC GGA         |                                                          |
| RORap                                    | ATCCTCCCTCTC CTCTTTAACC                                | AACGCGGATAACCGGATTTGT                                  | ChIP PCR                                                 |
| RORytp                                   | AGACACCACCCAAGACAGATT                                  | AAACCACAGCTACAGCCGCGG                                  | ChIP PCR                                                 |

|                 |                      |                        |          |
|-----------------|----------------------|------------------------|----------|
| T-betp          | GCGTAACAGCTAGCGAAAGA | GGGACTTTCAGGCAAAGGAA   | ChIP PCR |
| IL-17p          | CATGTGAATGGCACGATAGG | TGAGGTCAGCACAGAACCAC   | ChIP PCR |
| IL-17 CNS2      | CAGCGTGTGGTTTGGTTTAC | CTAGGTGGGTTCTCACTGG    | ChIP PCR |
| IFN- $\gamma$ p | ATCCCACAAGAATGGCACAG | TATACCTGATCGAAGGCTCCTC | ChIP PCR |

## Supplementary Figures

### Suppl. Figure 1 Characterization of the inhibitory activity of compound 5D on CRAC channels

(A) Comparison of the inhibitory effects of the lead compound 5 (10  $\mu$ M) and its analogue 5D (1  $\mu$ M) on CRAC channel-mediated SOCE in HeLa-OSN cells.

(B) TIRF microscopy analysis of HEK293 cells expressing STIM1-mCherry and Orai1-GFP in the presence of DMSO (left three panels) or compound 5D (10  $\mu$ M, right three panels). 1  $\mu$ M thapsigargin was added to deplete the intracellular stores ( $t = 0$ ) and epifluorescence (top panels) and TIRF (lower two panels) images of STIM1 and Orai1 clustering into ER-PM junctions are shown before and after store depletion. The graphs represent an average of normalized fluorescence intensity  $\pm$  s.e.m. of STIM1-mCherry (left panel) and Orai1-GFP (right panel) from measurements of 5 cells treated with (blue traces) and without (black traces) compound 5D (10  $\mu$ M).

(C) Compound 5D blocks currents generated by Orai1<sup>W176C</sup>. Measurement of currents from HEK293 cells expressing Orai1<sup>W176C</sup> (in the absence of STIM1). I-Vs were plotted in the absence (black trace), presence (red trace) or after washing out (green trace) of 10  $\mu$ M compound 5D. Each trace is representative of data obtained from six different cells.

(D) Compound 5D partially blocks currents generated by Orai1<sup>V102C</sup>. I-V relationship of currents from HEK293 cells expressing Orai1<sup>V102C</sup> (without STIM1) in the absence (black trace) and presence (blue trace) of 20  $\mu$ M compound 5D. Each trace is representative of data obtained from 8-10 different cells.

(E) Block of currents generated by Orai1<sup>V102</sup> mutants by compound 5D. Inhibition of currents generated by Orai1<sup>V102C</sup> ( $n = 8$ ) and Orai1<sup>V102A</sup> ( $n = 4$ ) mutants by 20  $\mu$ M compound 5D. Data represent average  $\pm$  s.e.m and are normalized to block of wild-type Orai1.

(F) Compound 5D does not block TrpC1 mediated SOCE. HEK293 cells co-expressing TrpC1 and STIM1 were treated with thapsigargin in Ca<sup>2+</sup>-free medium to deplete intracellular stores. Subsequently 2mM Ca<sup>2+</sup>-containing solution with and without compound 5D (20  $\mu$ M) was added to measure SOCE. Data represent average  $\pm$  s.e.m. of peak SOCE from 20-30 cells.

**(G)** Compound 5D blocks SOCE mediated by all three Orai proteins. Orai1<sup>-/-</sup> naïve CD4<sup>+</sup> T cells were transduced with viral vectors encoding Orai1, Orai2, and Orai3, cultured under non-polarizing conditions for 5 days, and examined for reconstitution of SOCE and inhibition by compound 5D (10 µM). Compound 5D suppressed SOCE induced by Orai proteins (blue trace), as well as the residual SOCE observed in Orai1<sup>-/-</sup> T cells (black trace). The control trace of SOCE from Orai1<sup>-/-</sup> T cells is repeated in all the panels. Data represent average ± s.e.m. of peak SOCE from 30-40 cells.

**Suppl. Figure 2 Compound 5D inhibits functions of effector T cells**

**(A)** Effects of compound 5D treatment in differentiation of regulatory T cells. Naïve T cells differentiated under Treg-polarizing conditions with compound 5D were examined for Foxp3 expression. A representative of three independent experiments is shown.

**(B)** Expression levels of IL-23R, CCR6, and LFA-1 (Integrin αL) from naïve T cells differentiated under T<sub>H</sub>17-skewing conditions in the presence or absence of compound 5D. The transcript levels were normalized to those of DMSO-treated cells. Data represent average ± standard deviation from triplicates.

**(C)** Expression levels of various transcription factors involved in T<sub>H</sub>17 differentiation. Transcripts were analyzed from naïve T cells differentiated under T<sub>H</sub>17-polarizing conditions in the presence or absence of 10 µM of compound 5D. mRNA levels were normalized to that of β-actin. Data represent average ± standard deviation from triplicates.

**Suppl. Figure 3 Compound 5J-4 reduces EAE symptoms without affecting the survival of mice**

**(A)** Survival curve of mice after alternate day intraperitoneal injection with compound 5J-4 (2 mg/kg) or carrier (DMSO).

**(B)** Incidence of EAE induction by MOG<sub>35-55</sub> immunization in animals injected with vehicle or compound 5J-4 (2 mg/kg).

**(C)** Histology of transverse sections of spinal cords from DMSO and compound 5J-4-injected mice. Luxol Fast Blue and H&E staining of spinal cords. Left images are depicted at 4x magnification while those on right show 10x magnification of boxed areas.

**(D)** Compound 5J-4 treatment decreases inflammatory T cell differentiation in vivo. The transcript levels of transcription factors were measured in cells isolated from the draining lymph nodes of DMSO and compound 5J-4-treated mice after 14 days of immunization with MOG<sub>35-55</sub> peptide/CFA. The graph shows average ± standard deviation from triplicates.

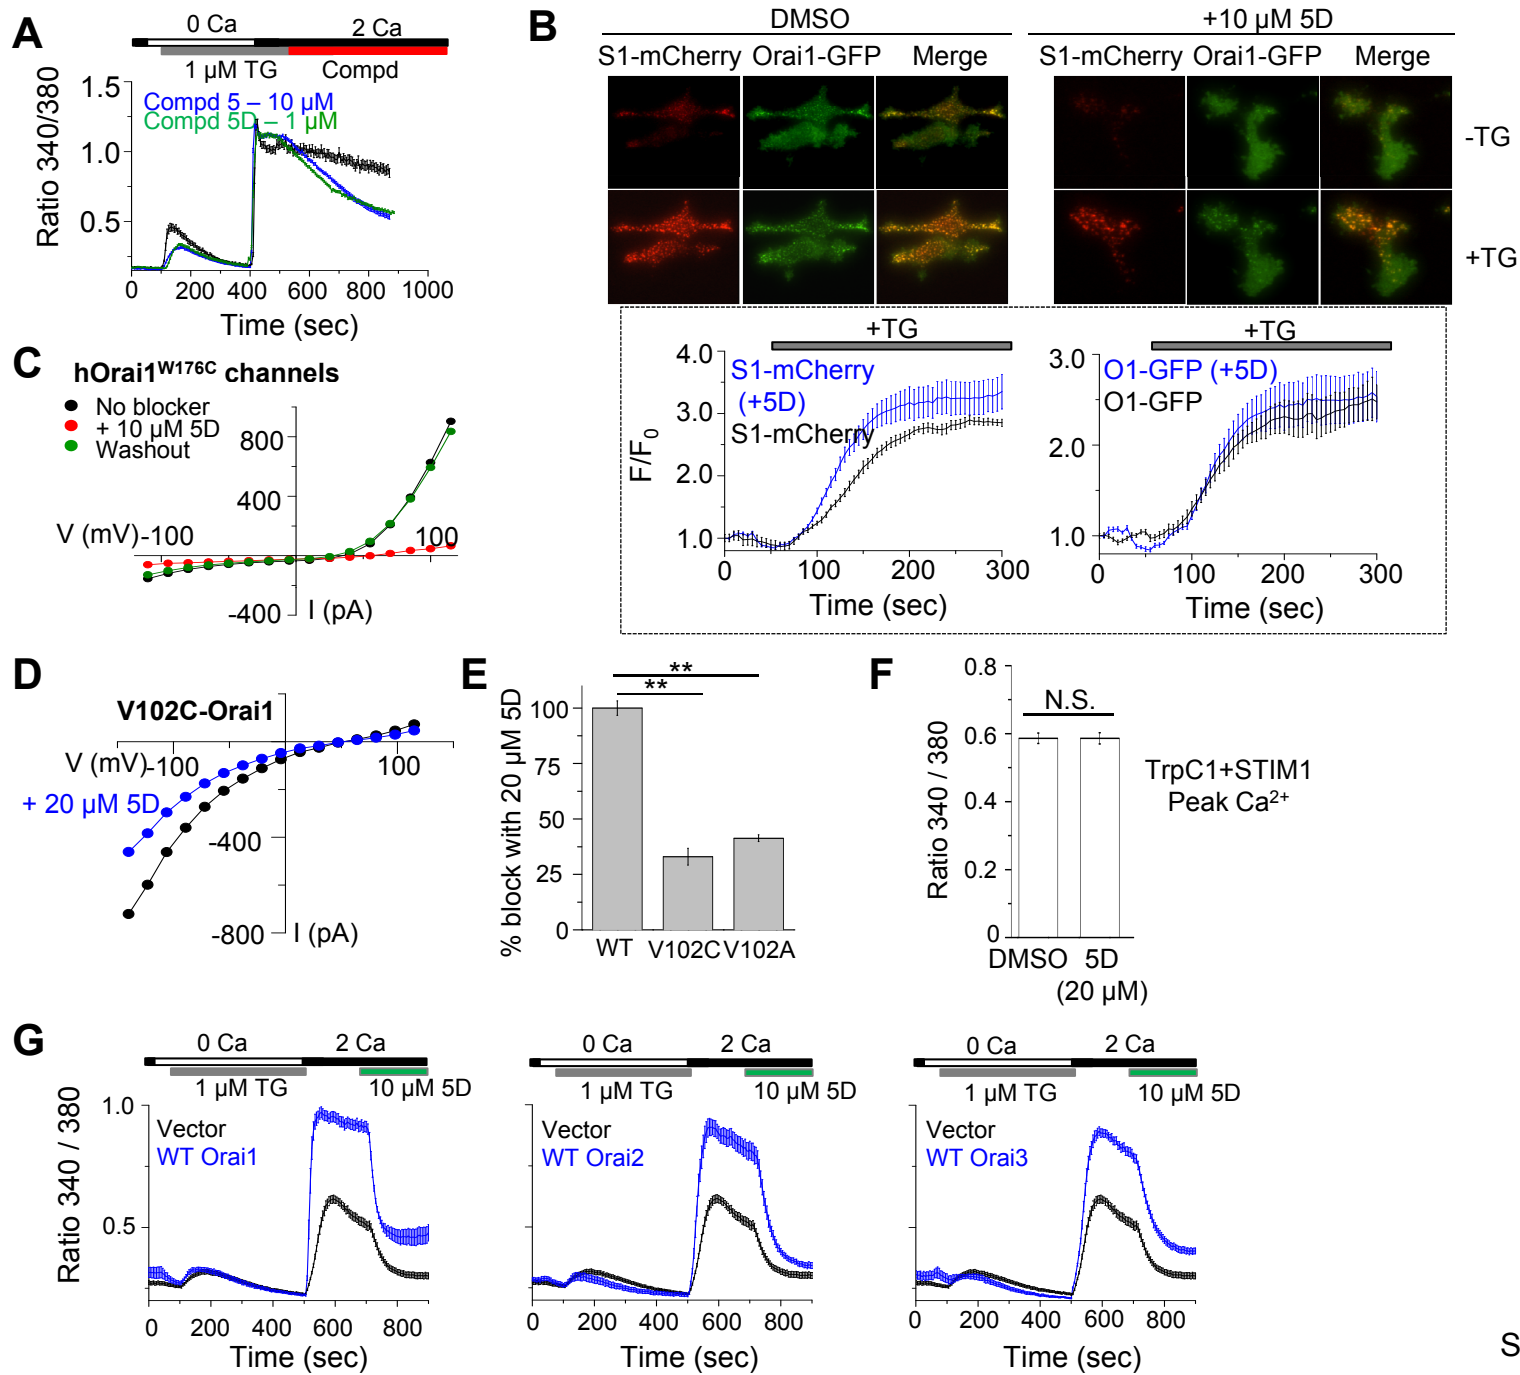

Suppl Figure 1

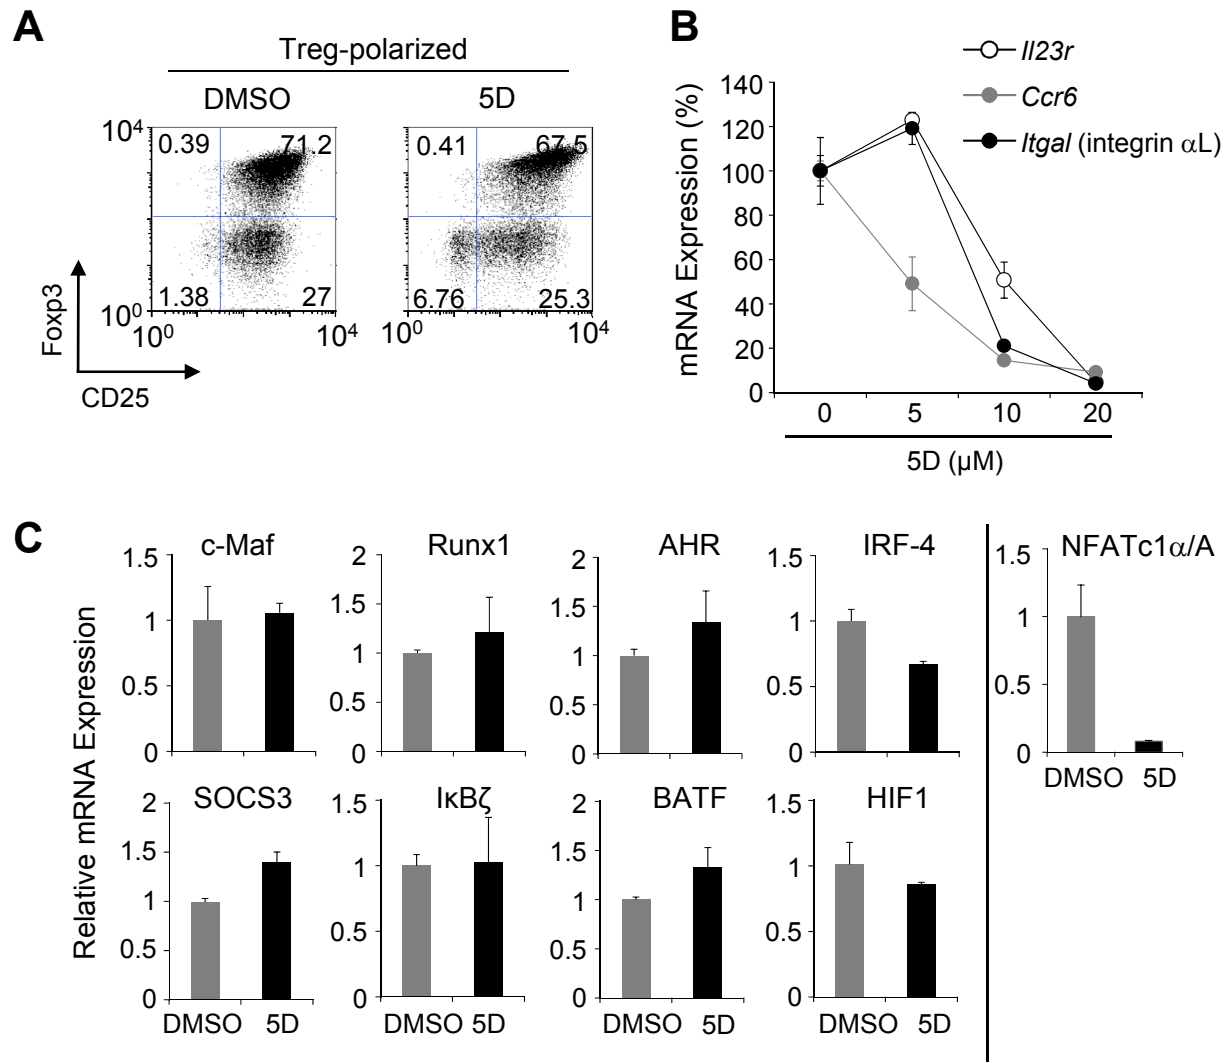

Suppl Figure 2

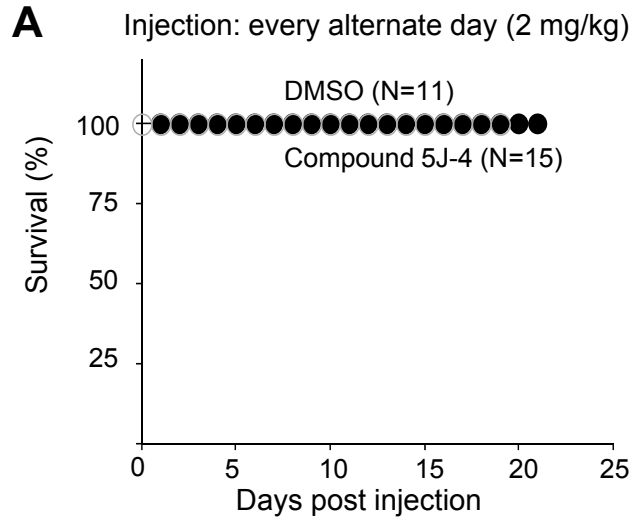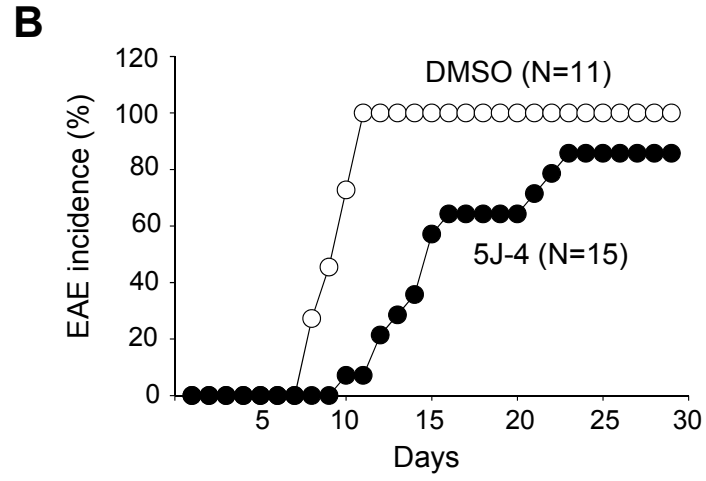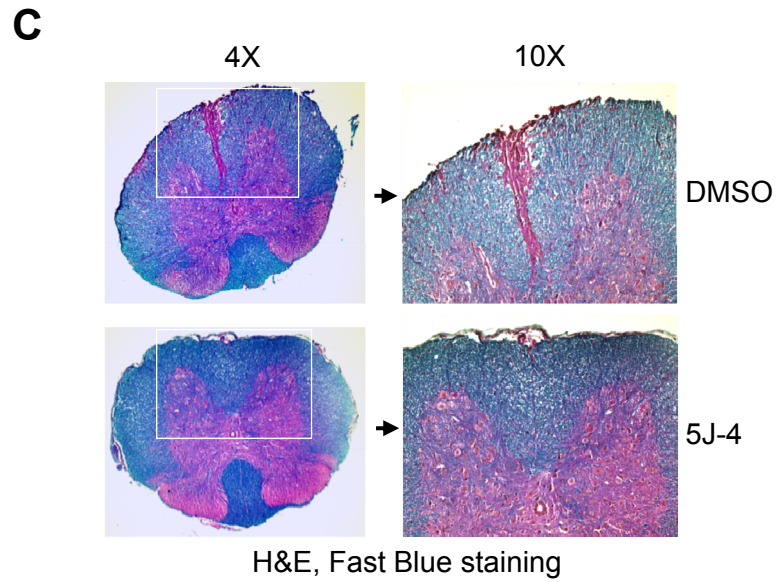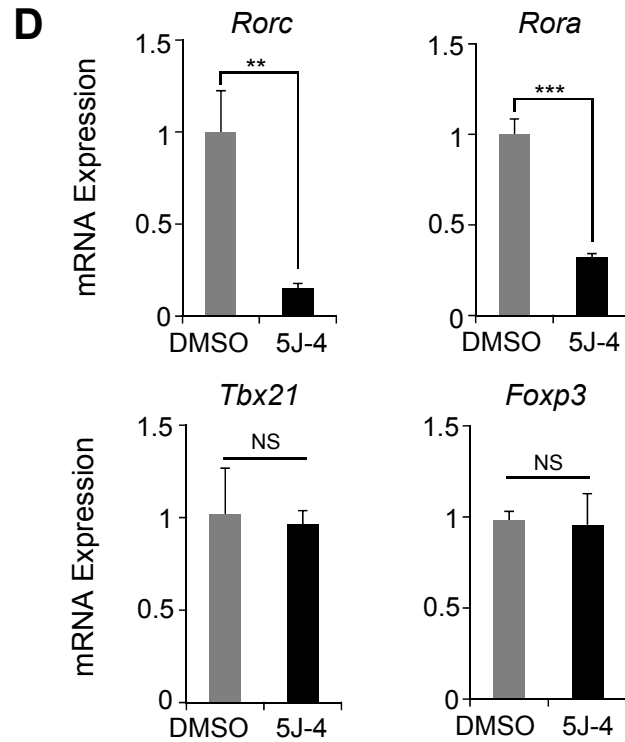

Supplement: NIHMS539171-supplement-1.pdf [file NIHMS539171-supplement-1.pdf]
